# Supplementary material
Source: Springer Nature journal article supplement (https://www.springermedizin.de/resource/supplementary/12990_2010_273_MOESM6_ESM.pdf/9612924)

# OA, WDR neurons

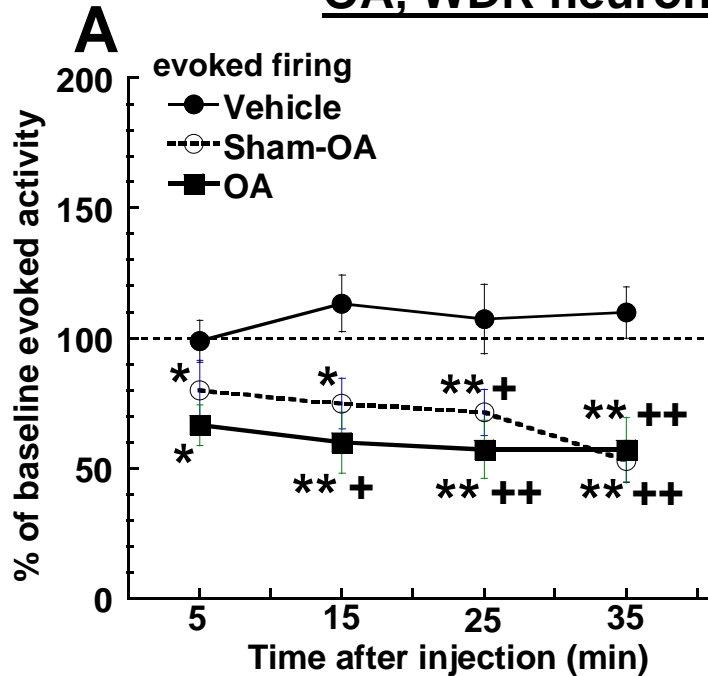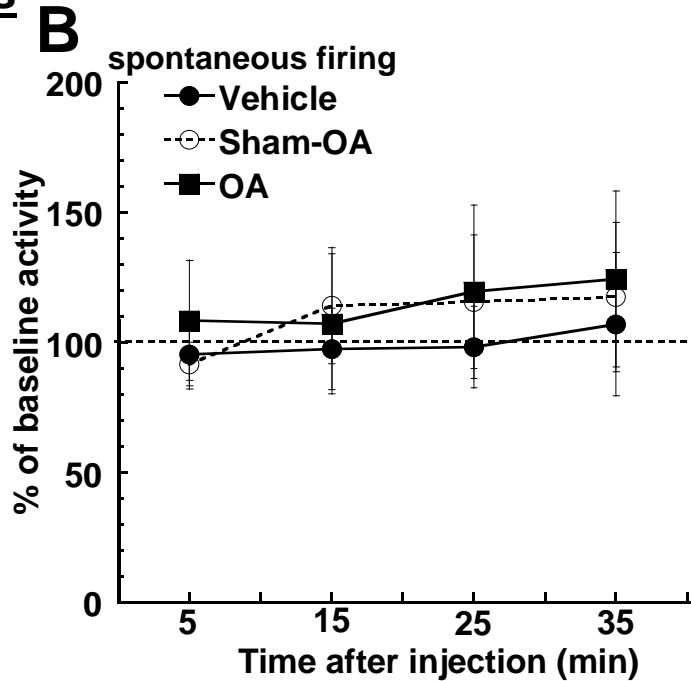

Supplement: MOESM6 [file 9612924]
